# Supplementary material for: Daphnia-inspired dynamic slippery chemically bonded liquid surface for the active prevention of covalently attached foulant adhesion
Source: Royal Society of Chemistry journal article supplement (doi:10.1039/d3tb00154g), 2023-01-01
Supplement: d3tb00154g1.pdf [file d3tb00154g1.pdf]

## Electronic Supplementary Information (ESI)

### Daphnia-inspired dynamic slippery chemically bonded liquid surface for active prevention of covalently attached foulants adhesion

Huajun Zhai,<sup>a</sup> Xiangyu Li,<sup>b</sup> Shuaiheng Zhao,<sup>a</sup> Jiujiang Ji,<sup>a</sup> Yue Liu,<sup>a</sup> Ye Tian,<sup>a</sup> Yen Wei,<sup>a</sup> Na Liu<sup>\*a</sup> and Lin Feng<sup>\*a</sup>

*a. Engineering Research Center of Advanced Rare Earth Materials (Ministry of Education), Department of Chemistry, Tsinghua University, 100084, China. E-mail: liun12@tsinghua.org.cn; fl@mail.tsinghua.edu.cn*

*b. Shenyang National Laboratory for Materials Science, ElectrobioMaterials Institute, Key Laboratory for Anisotropy and Texture of Materials (Ministry of Education), Northeastern University, Shenyang 110819, China*

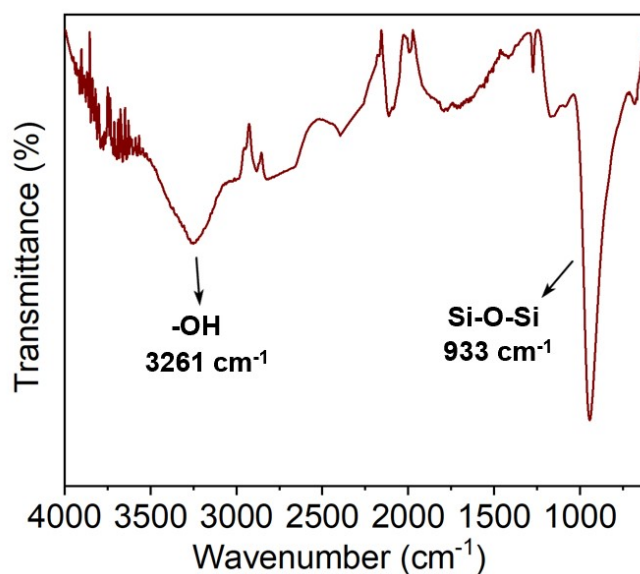

**Fig. S1** FTIR spectrum of SiO<sub>2</sub> electro-deposited Al substrate.

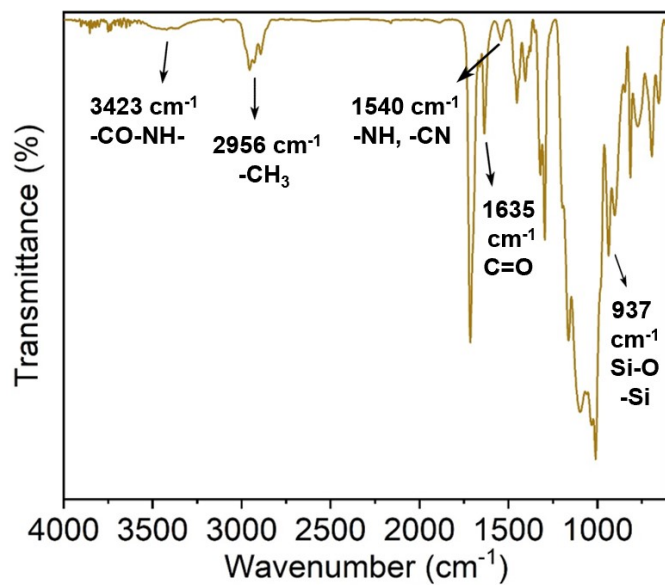

Fig. S2 FTIR spectrum of PDMS-free surface.

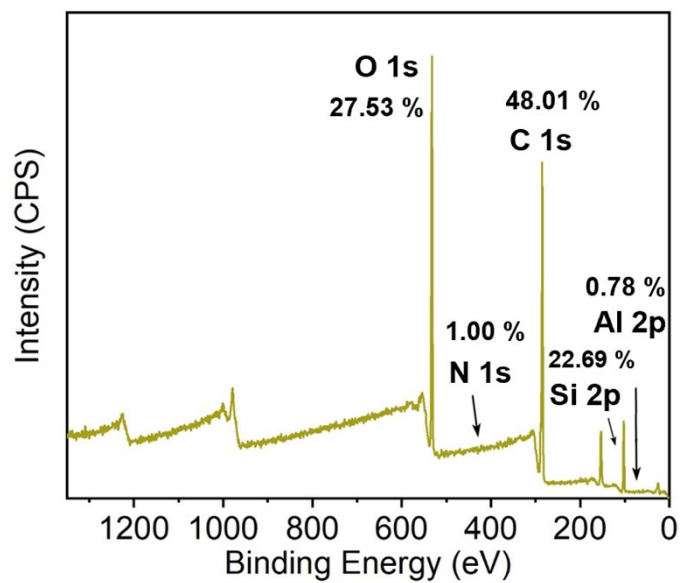

Fig. S3 XPS spectrum of PDMS-free surface.

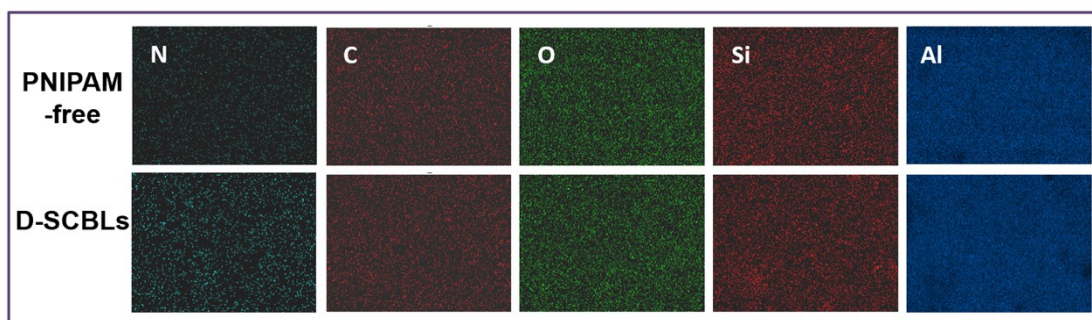

Fig. S4 Elemental mappings of the PNIPAM-free surface and D-SCBLs.

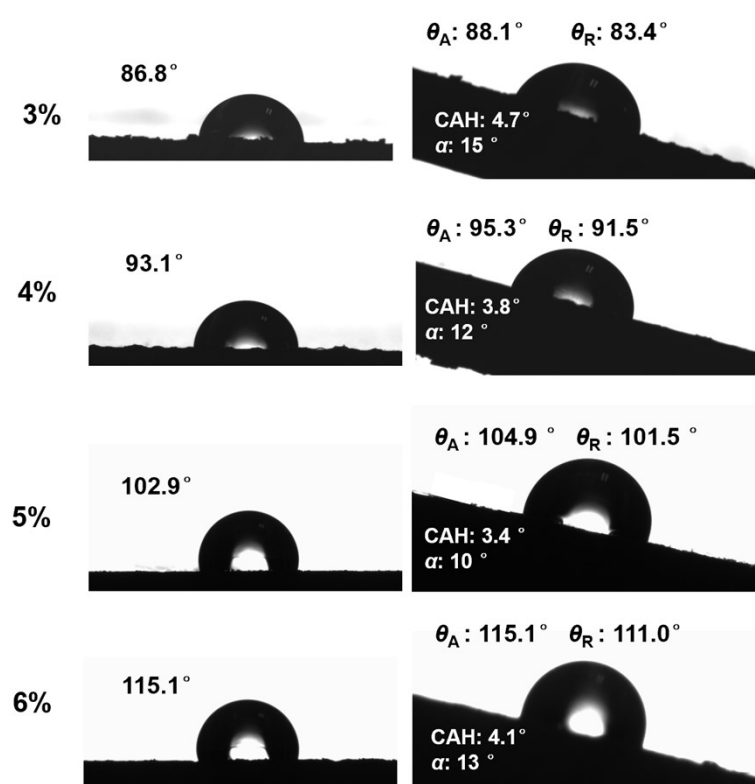

Fig. S5 Water CAs,  $\vartheta_A$ ,  $\vartheta_R$ , CAH, and  $\alpha$  of D-SCBLs prepared with different concentrations (wt%) of NIPAM.

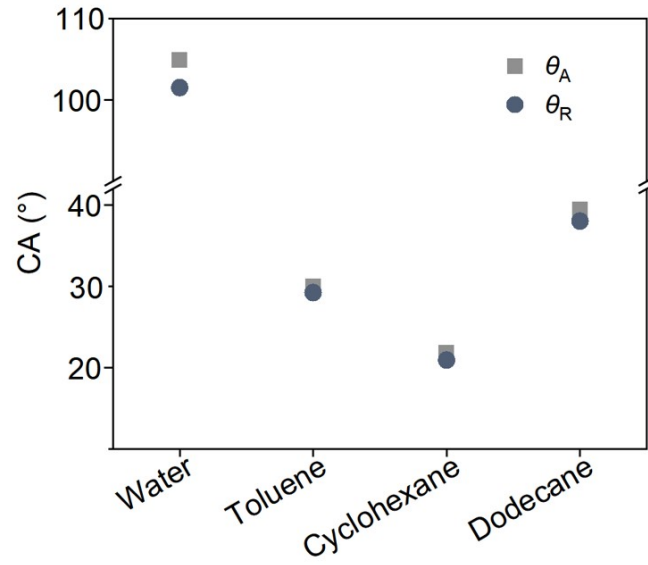

Fig. S6 CAs of various liquids on the D-SCBLs.

Video S1 Sliding test of water droplet on the D-SCBLs.

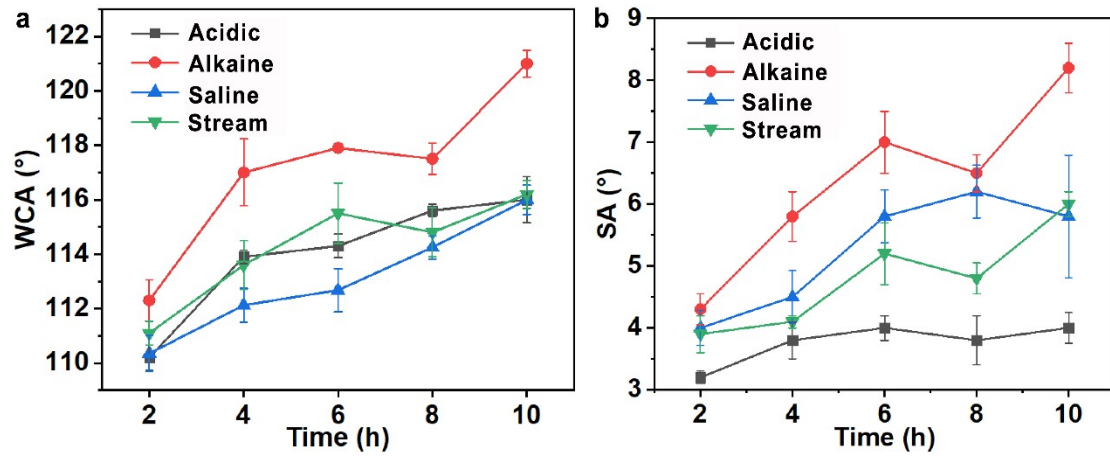

Fig. S7 (a, b) Chemical resistance and mechanical durability tests of the D-SCBLs as a function of immersion times in acidic, alkaline and saline solutions together with water stream scouring time, respectively.

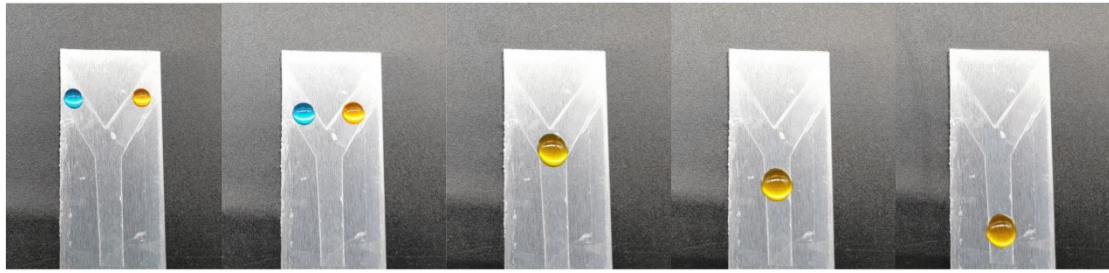

**Fig. S8** Droplets motion on the D-SCBLs with Y-shaped path as a transportation channel. Two water droplets were dyed blue and green, respectively.

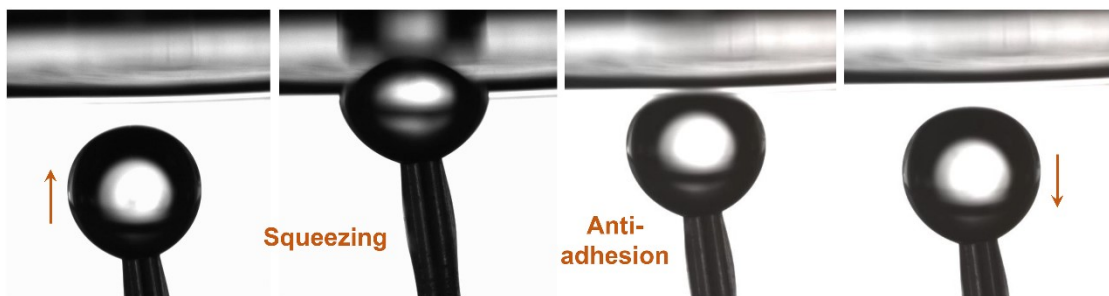

**Fig. S9** Photographs of the dynamic underwater oil-adhesion measurements on the D-SCBLs. An engine oil droplet ( $3 \mu\text{L}$ ) was utilized as the detecting probe to contact and leave the surface.

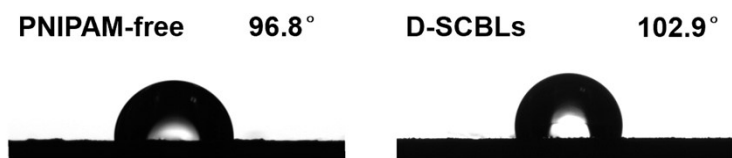

Fig. S10 Water CAs of the PNIPAM-free surface and D-SCBLs.

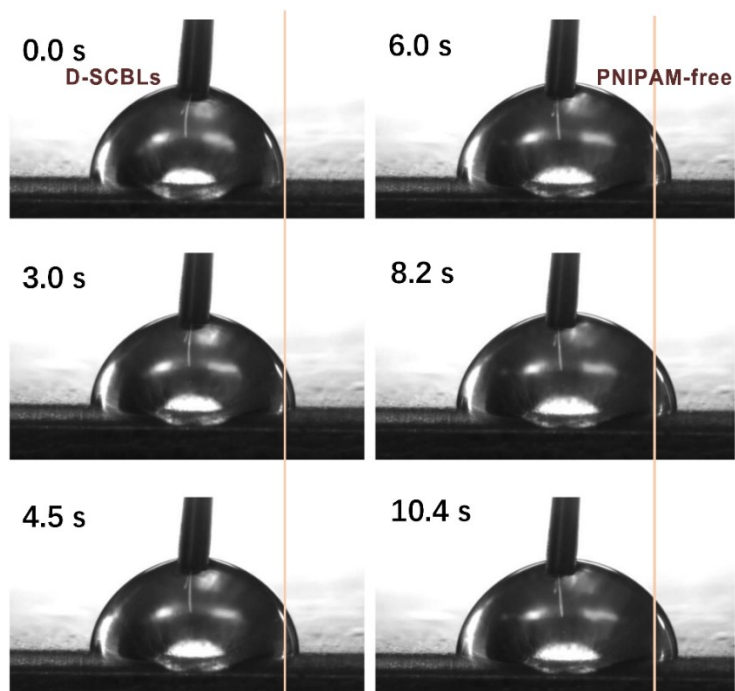

Fig. S11 Dynamic process of a seawater droplet motion at the boundary between D-SCBLs and PNIPAM-free surface.

### Dual responsive anti-adhesion material

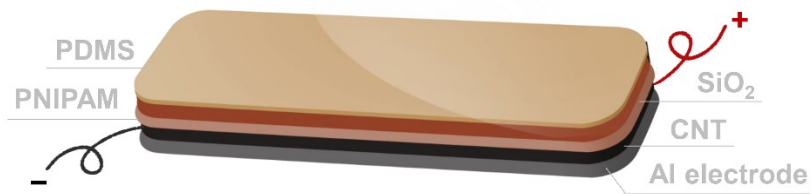

**Fig. S12** Schematic illustration of a possible designed dual responsive anti-adhesion material derived from the D-SCBLs.

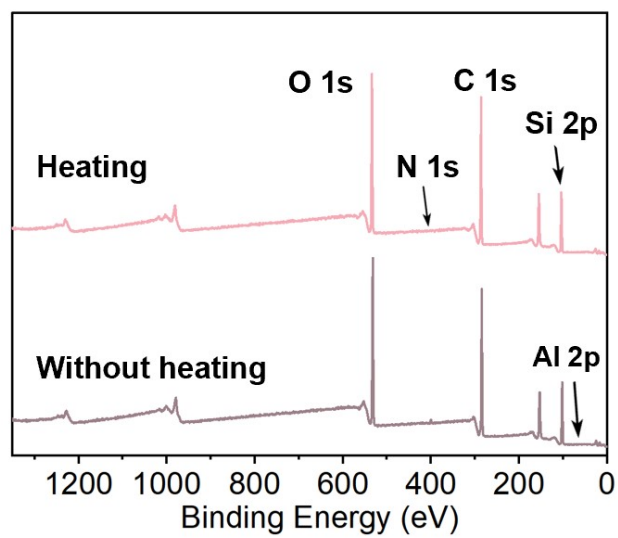

**Fig. S13** XPS spectra of D-SCBLs after being immersed in BSA solution under heating or without heating processing, respectively.

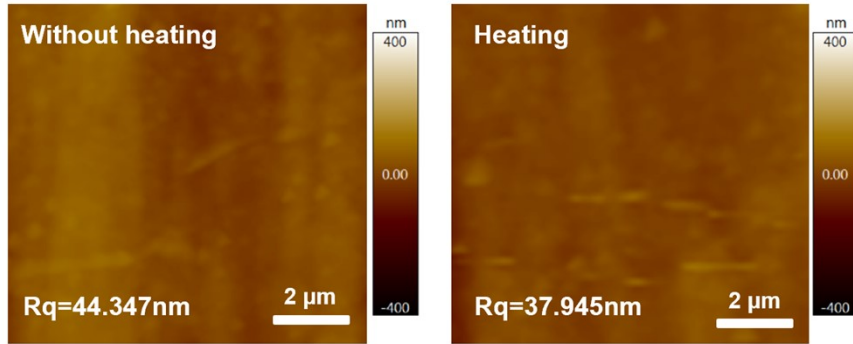

**Fig. S14** AFM images of D-SCBLs after being immersed in BSA solution under heating or without heating processing, respectively.

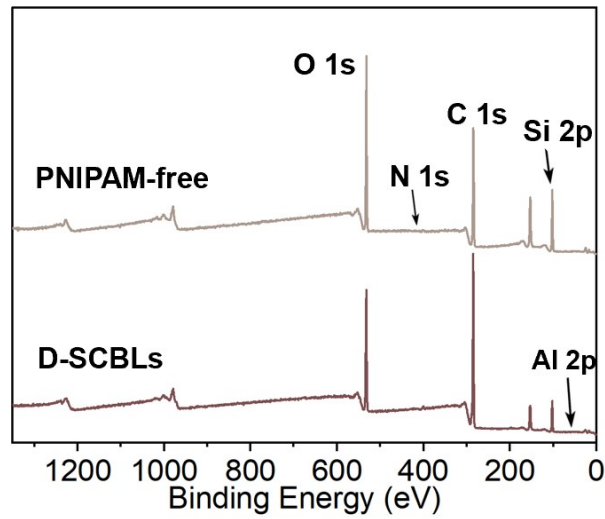

**Fig. S15** XPS spectra of the D-SCBLs and PNIPAM-free surface after being immersed in dopamine solution for 6 h, respectively.



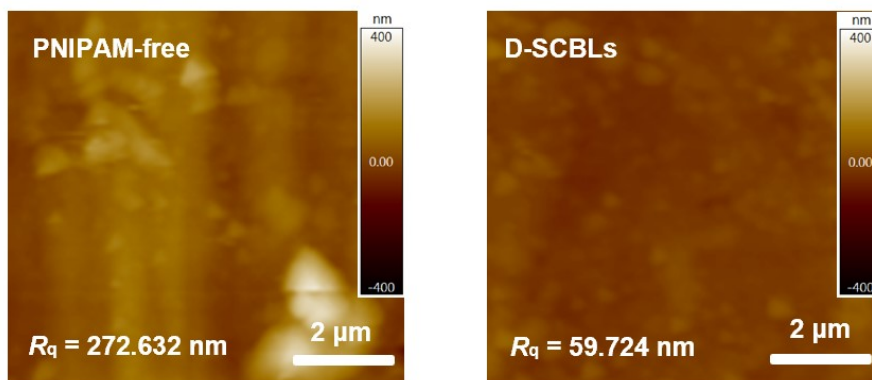

**Fig. S16** AFM images of the PNIPAM-free surface and D-SCBLs after being immersed in dopamine solution for 6 h, respectively.

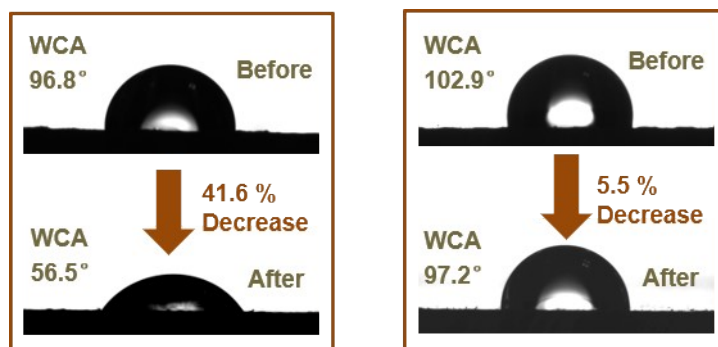

**Fig. S17** Water CA variations of the PNIPAM-free surface and D-SCBLs after being immersed in dopamine solution for 6 h, respectively.

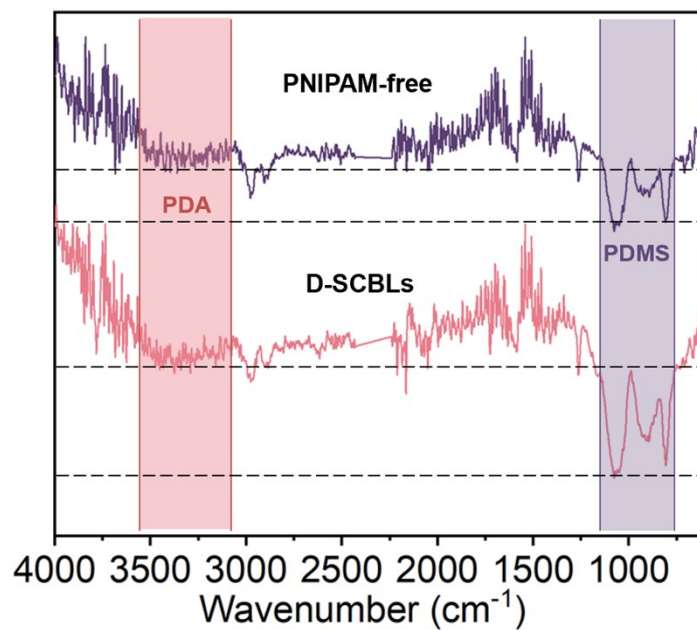

**Fig. S18** FTIR spectra of the PNIPAM-free surface and D-SCBLs after being immersed in dopamine solution for 6 h, respectively.

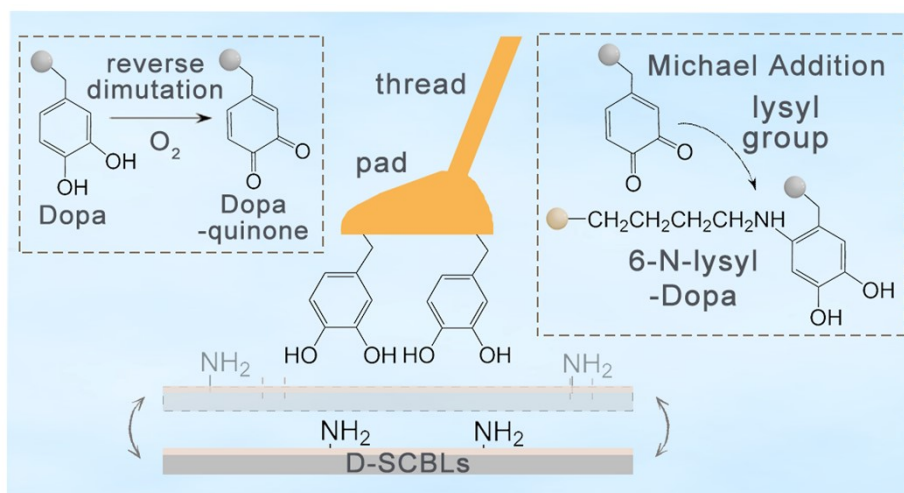

**Fig. S19** Schematic illustration of the anti-adhesion mechanism of D-SCBLs.

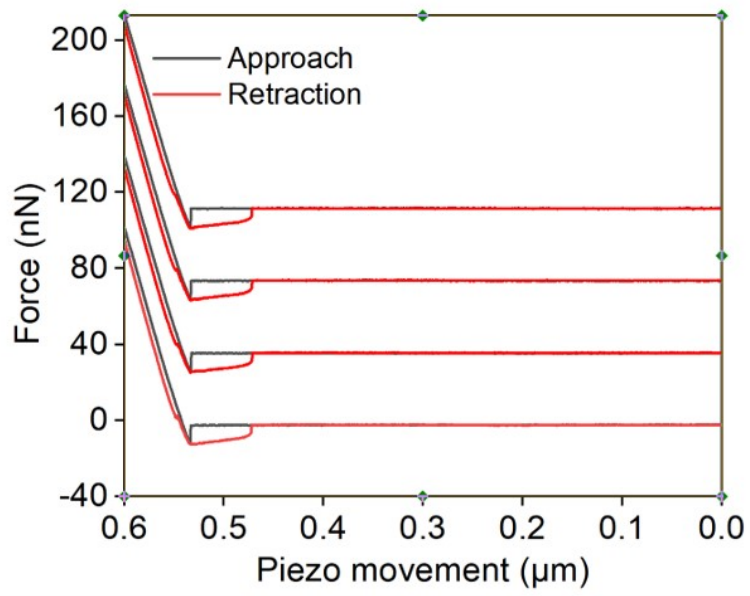

**Fig. S20** F-D curves of PDA-modified AFM tip interacting with the pristine D-SCBLs.
